# Supplementary material for: Temporal evolution of the microbiome, immune system and epigenome with disease progression in ALS mice
Source: PubMed Central journal article supplement (PMC6906635; doi:10.1242/dmm.041947), 2019-11-15
Supplement: dmm-13-041947-s1.pdf [file dmm-13-041947-s1.pdf]

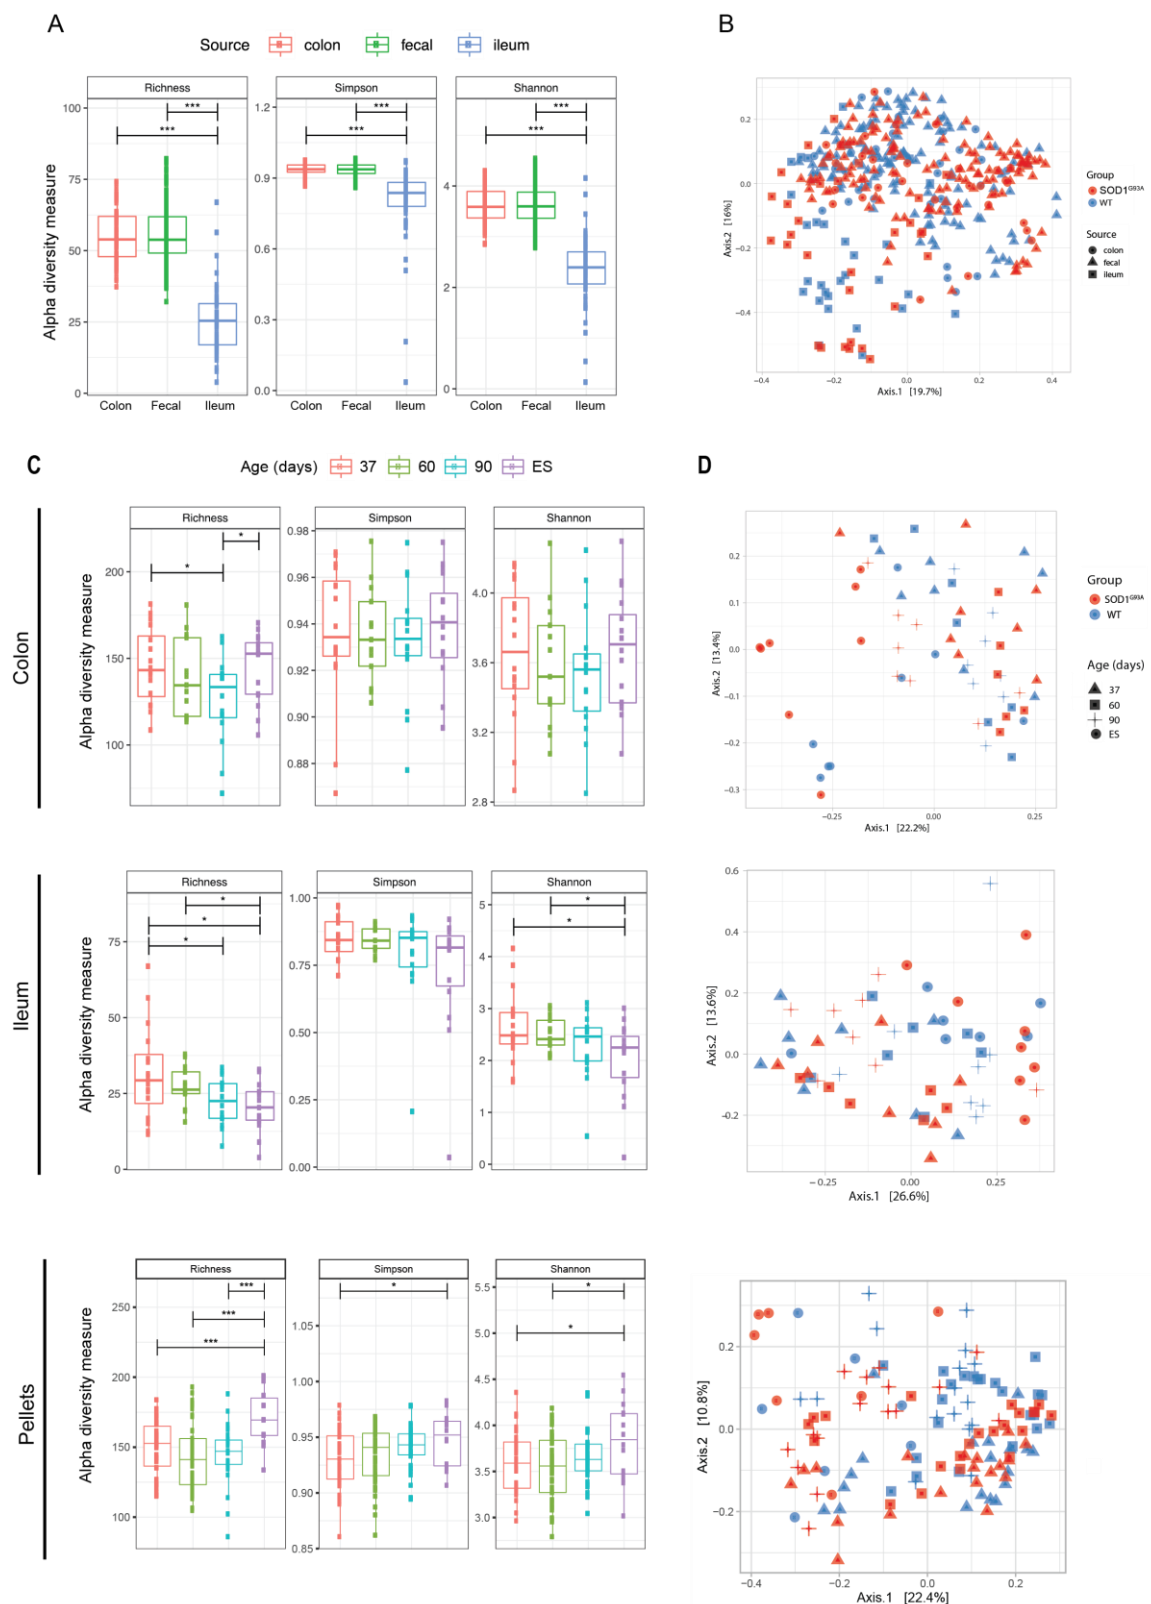

**Fig. S1. Age, intestinal niche, and disease state determine overall bacterial diversity.** (A) Overall alpha diversity by ASVs of pooled SOD1<sup>G93A</sup> and WT samples was determined by richness, Simpson, and Shannon indices for colon (red), fecal pellets (green), and ileum (blue). Data are presented by box plots with horizontal line indicating the median for each data set. The x-axis represents the grouping, the y-axis represents the distance, and boxes

of different colors represent each group. \*\*\* $P < 0.001$ , by ANOVA;  $n = 16$  mice per group for 37 and 90 days and ES;  $n = 14$  for 60 day-old mice. (B) PCoA plots representing beta diversity of bacterial communities from colon, fecal pellets, and ileum samples of SOD1<sup>G93A</sup> (red) and WT (blue) mice. (C) Overall alpha diversity by ASVs of pooled SOD1<sup>G93A</sup> and WT samples was determined by richness, Simpson, and Shannon indices in colon (top), ileum (middle), and fecal pellets (bottom) at 30 (red), 60 (green), 90 (blue) days, and ES (purple). Data are presented by box plots with horizontal line indicating the median for each data set. The x-axis represents the grouping, the y-axis represents the distance, and boxes of different colors represent each group. \* $P < 0.01$ , by ANOVA;  $n = 16$  mice per group for 37 and 90 days and ES;  $n = 14$  for 60 day-old mice. (D) PCoA plots representing beta diversity of bacterial communities from colon, fecal pellets, and ileum samples of SOD1<sup>G93A</sup> (red) and WT (blue) mice over time [30 (triangle), 60 (square), 90 (cross) days, and ES (circle)].

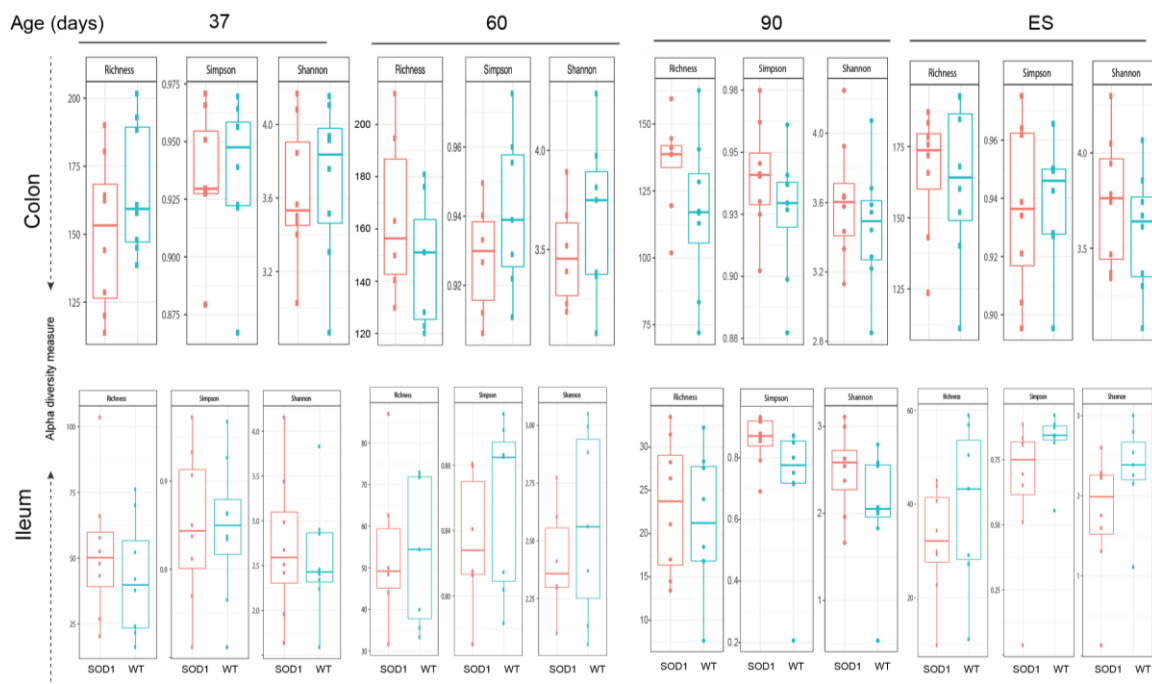

**Fig. S2. Alpha diversity is not altered in the colon and ileum of  $SOD1^{G93A}$  mice.** Alpha diversity for colon and ileum was determined by richness, Simpson, and Shannon indices in  $SOD1^{G93A}$  (red) and WT (blue) mice. Data are presented by box plots with horizontal line indicating the median for each data set. The number of animals (n) per group ( $SOD1^{G93A}/WT$ ) at each time point was: colon, 37 days=8/8, 60 days=7/6, 90 days=8/8, ES=8/8; ileum, 37 days=8/8, 60 days=7/6, 90 days=8/8, ES=7/8.

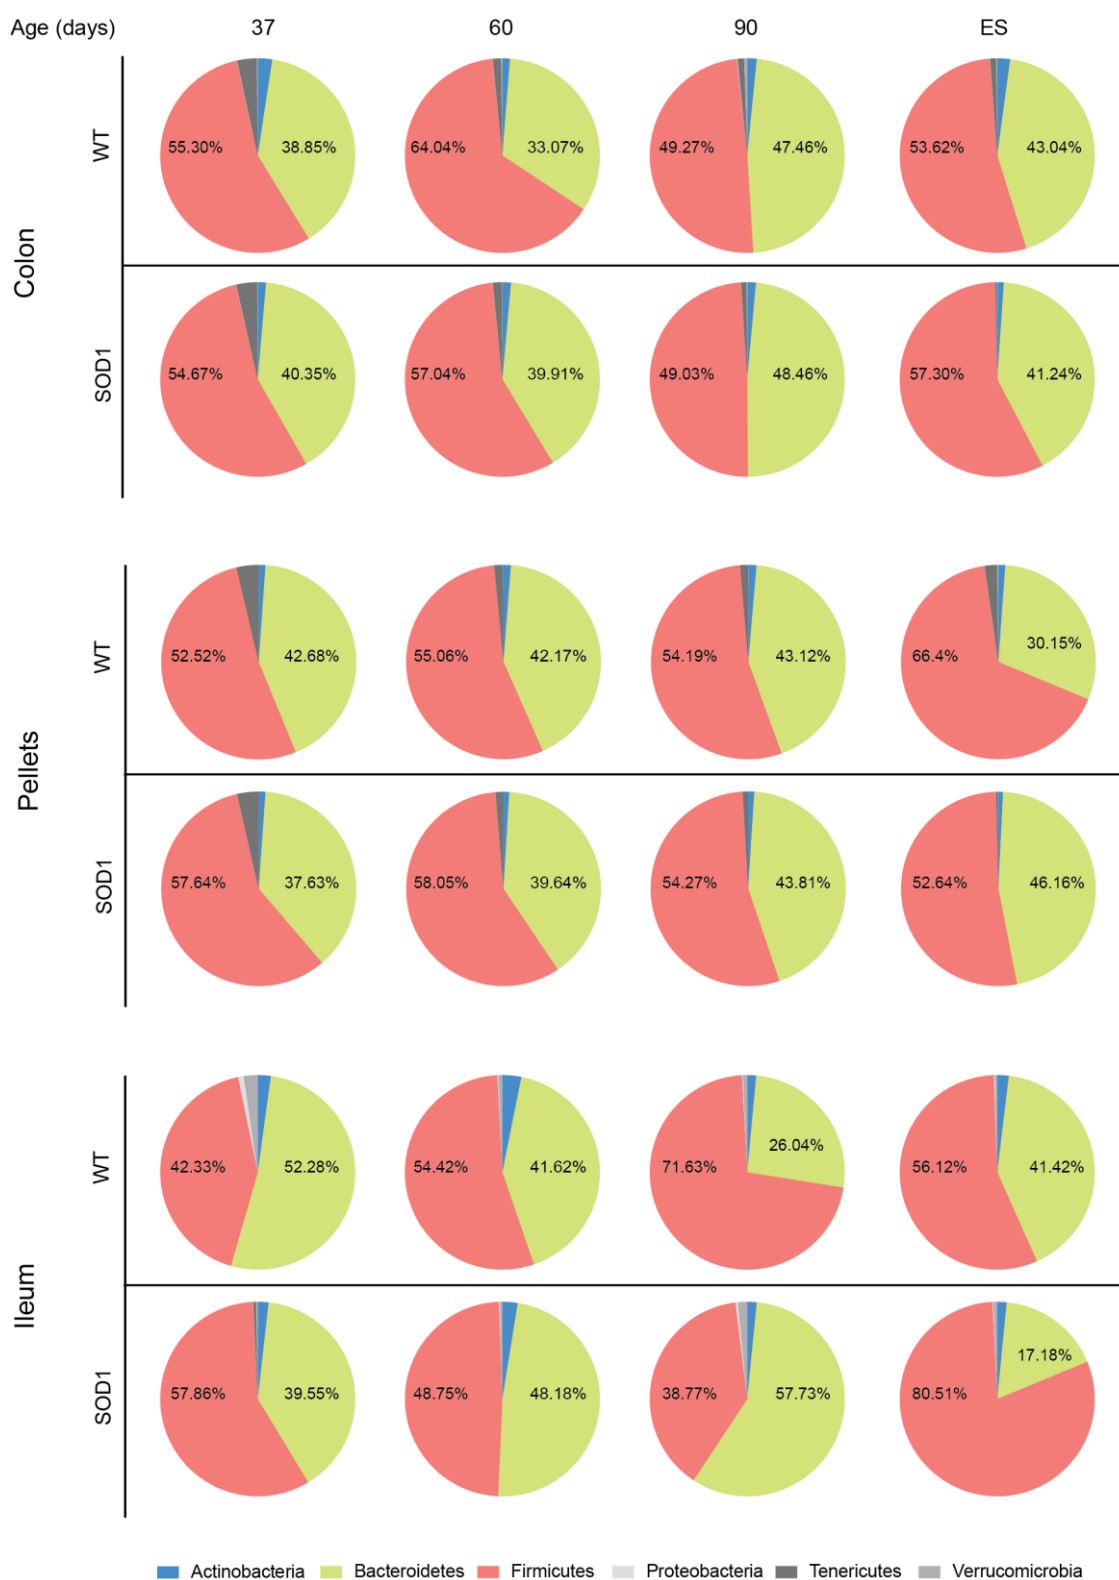

**Fig. S3. Firmicutes (F) to Bacteroidetes (B) proportions in SOD1<sup>G93A</sup> versus WT mice.** F (red) and B (green) proportions represented as pie charts of cumulative relative abundance for all samples at each time point 37, 60, and 90 days and ES in colon (top), pellets (middle), and ileum (bottom). Pairwise comparison between samples from SOD1<sup>G93A</sup> versus WT mice was performed using a Mann-Whitney test for each F and B species that contributed >1% to abundance to evaluate *P*-values (Table S3).

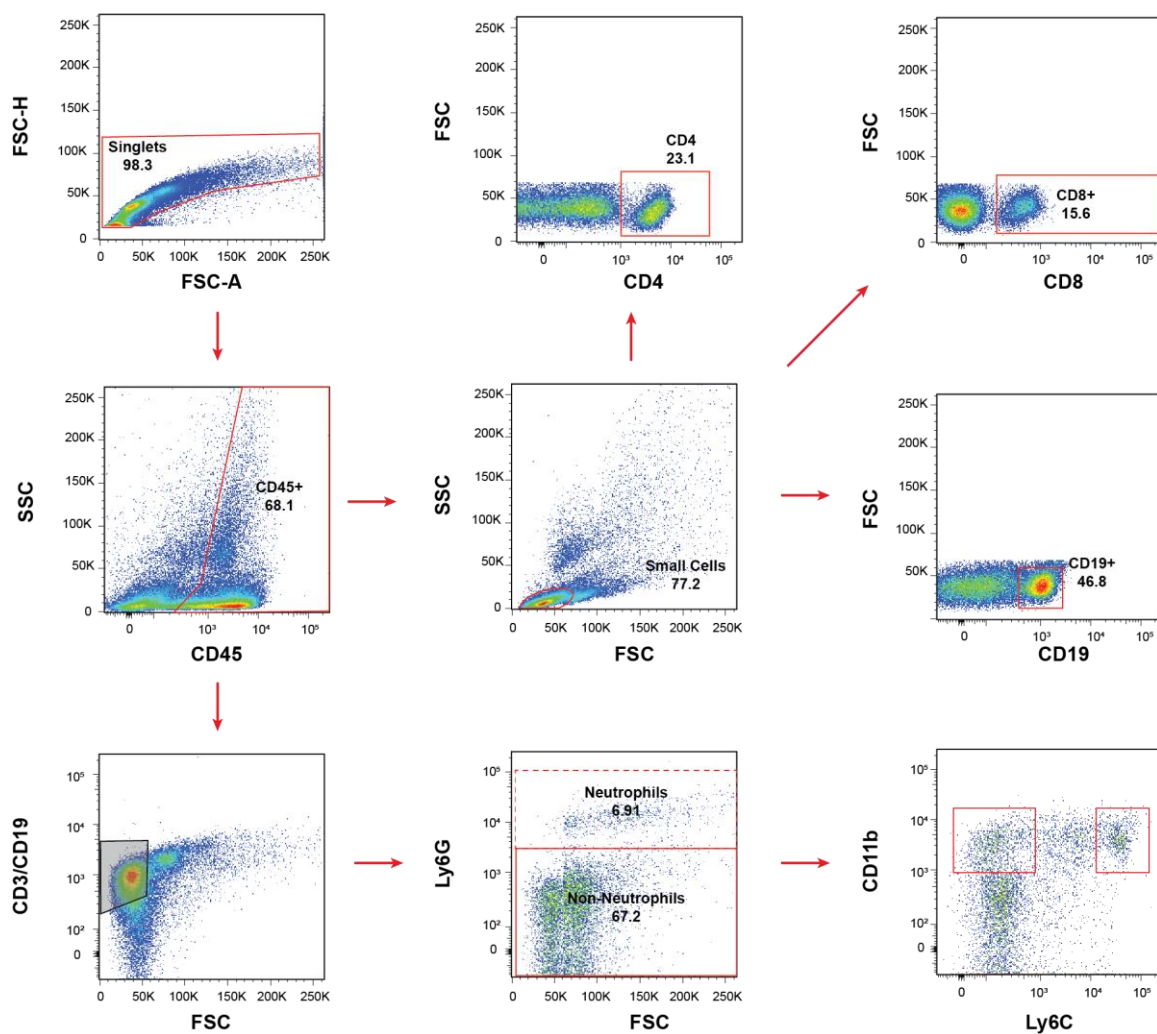

**Fig. S4. Gating strategy for immune cells from blood.** Staining was performed using CD45, CD3, CD4, CD8, CD19, Ly6C, Ly6G, and CD11b. Within CD45<sup>+</sup> cells, CD4 T cells (CD3<sup>+</sup> CD4<sup>+</sup> CD8<sup>-</sup>), CD8 T cells (CD3<sup>+</sup> CD4<sup>-</sup> CD8<sup>+</sup>), or B cells (CD3<sup>-</sup> CD19<sup>+</sup>) were identified. Myeloid cells were identified using side scatter (SSC), CD11b, Ly6C, Ly6G, and CD45 for neutrophils (SSC<sup>high</sup> CD11b<sup>+</sup> Ly6G<sup>+</sup>), and monocytes (CD45<sup>high</sup> CD11b<sup>+</sup> Ly6G<sup>-</sup>, Ly6C<sup>±</sup>).

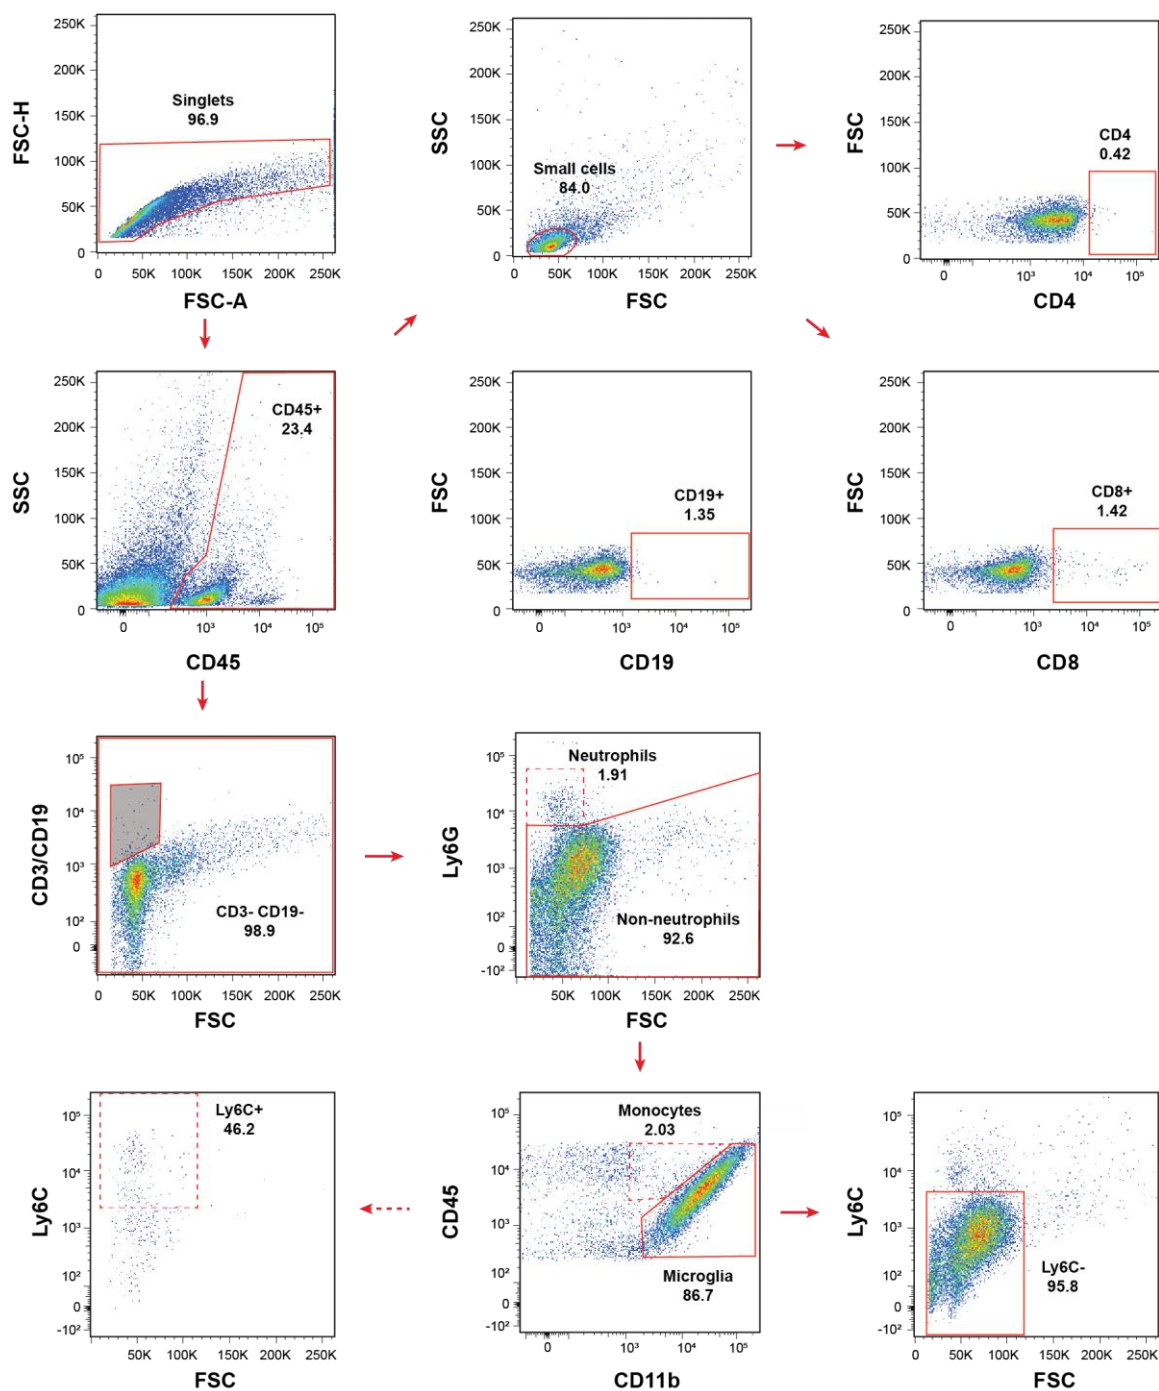

**Fig. S5. Gating strategy for immune cells from brain and spinal cord tissue.** Staining was performed using CD45, CD3, CD4, CD8, CD19, Ly6C, Ly6G, and CD11b. Within CD45<sup>+</sup> cells, CD4 T cells (CD3<sup>+</sup> CD4<sup>+</sup> CD8<sup>-</sup>), CD8 T cells (CD3<sup>+</sup> CD4<sup>-</sup> CD8<sup>+</sup>), or B cells (CD3<sup>-</sup> CD19<sup>+</sup>) were identified. Myeloid cells were identified using side scatter (SSC), CD11b, Ly6C, Ly6G, and CD45 for neutrophils (SSC<sup>high</sup> CD11b<sup>+</sup> Ly6G<sup>+</sup>), Ly6C<sup>+</sup> monocytes (CD45<sup>high</sup> CD11b<sup>+</sup> Ly6G<sup>-</sup>, Ly6C<sup>+</sup>), and microglia (CD45<sup>mid</sup> CD11b<sup>+</sup> Ly6G<sup>-</sup>).

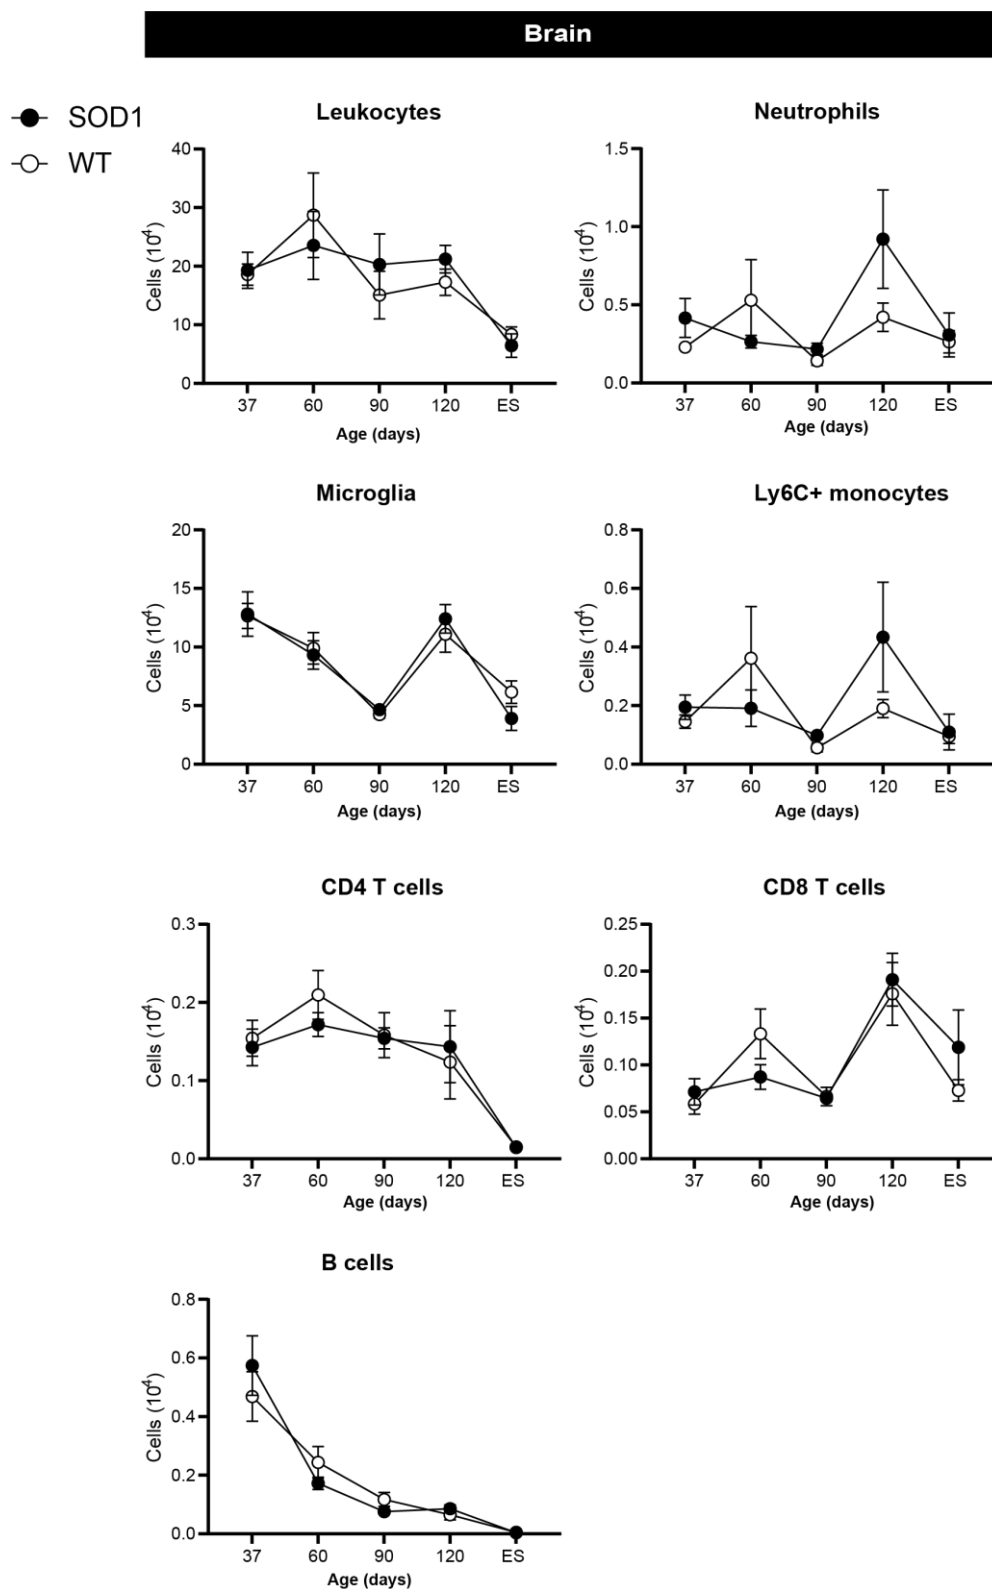

**Fig. S6. Immune cell populations in the brain are not significantly altered during ALS.** Immune cell populations were assessed in SOD1<sup>G93A</sup> (black) and WT (white) mice aged 37, 60, 90, and 120 days and at ES in brain tissue. Statistical analysis by two-tailed Student's t-test with multiple comparisons; the number of animals (n) per group (SOD1<sup>G93A</sup>/WT) at each time point was: 37 days=8/8, 60 days=7/8, 90 days=8/8, 120 days=8/8, ES=8/7; data expressed as mean ± s.e.m.





**Fig. S7. Myeloid cells in the spinal cord are more activated during late-stage ALS.** Flow cytometer histograms of forward scatter (size), F4/80, and CD11c expression levels were used to assess microglia and Ly6C<sup>+</sup> monocyte activation in (A) brain and (B) spinal cord tissue in SOD1<sup>G93A</sup> (dark grey) and WT (light grey) mice. Displayed histograms are representative plots from ES mice. Histograms were used to generate fold-increase in forward scatter and F4/80, and CD11c expression in SOD1<sup>G93A</sup> (black) and WT (white) mice aged 37, 60, 90, and 120 days and at ES in (A) brain and (B) spinal cord tissue. \* $P < 0.01$ , \*\*\*\* $P < 0.0001$ , by two-tailed Student's t-test with multiple comparisons; the number of animals (n) per group (SOD1<sup>G93A</sup>/WT) at each time point was: 37 days=8/8, 60 days=7/8, 90 days=8/8, 120 days=8/8, ES=8/7; data expressed as mean  $\pm$  s.e.m.

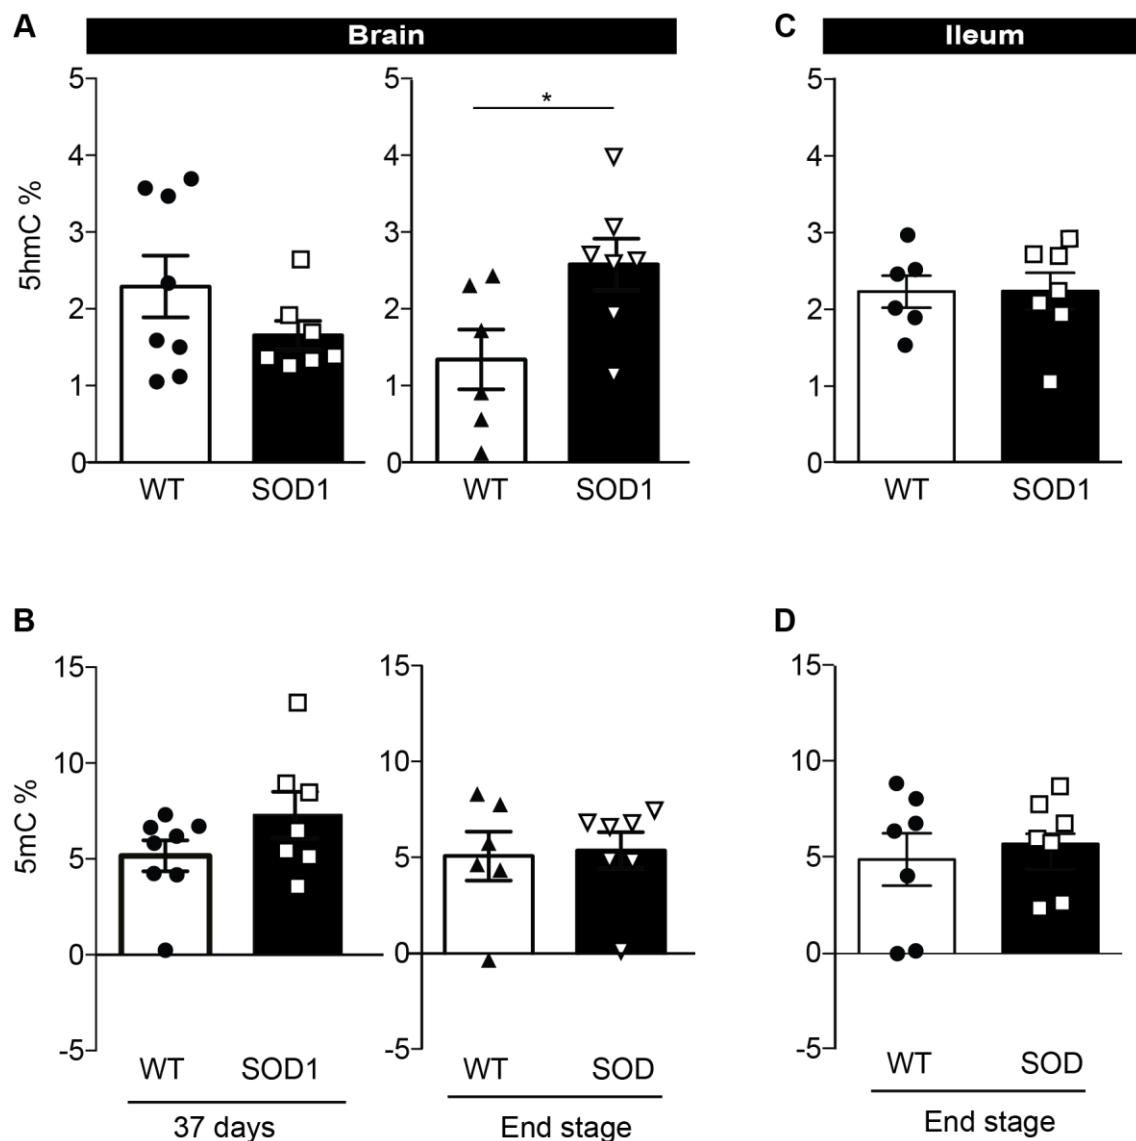

**Fig. S8. Global hydroxymethylation (5hmC) but not methylation (5mC) is altered in the CNS during ALS progression.** Genomic DNA from 37 day-old or ES brain (A, B) or ileum (C, D) from SOD1<sup>G93A</sup> (white) or WT (black) mice was assessed for global 5hmC (A, C) or 5mC (B, D) by a colorimetric ELISA assay; \**P*<0.05, by Student's t-test; the number of animals (n) per group (SOD1<sup>G93A</sup>/WT) at each time point for 5hmC was: ileum at ES=7/6; brain at 37 days=7/8, ES=7/6. The number of animals (n) per group (SOD1<sup>G93A</sup>/WT) at each time point for 5mC was: ileum at ES=7/7; brain at 37 days=7/8, ES=7/6; data expressed as mean ± s.e.m. of percent (% of total DNA).

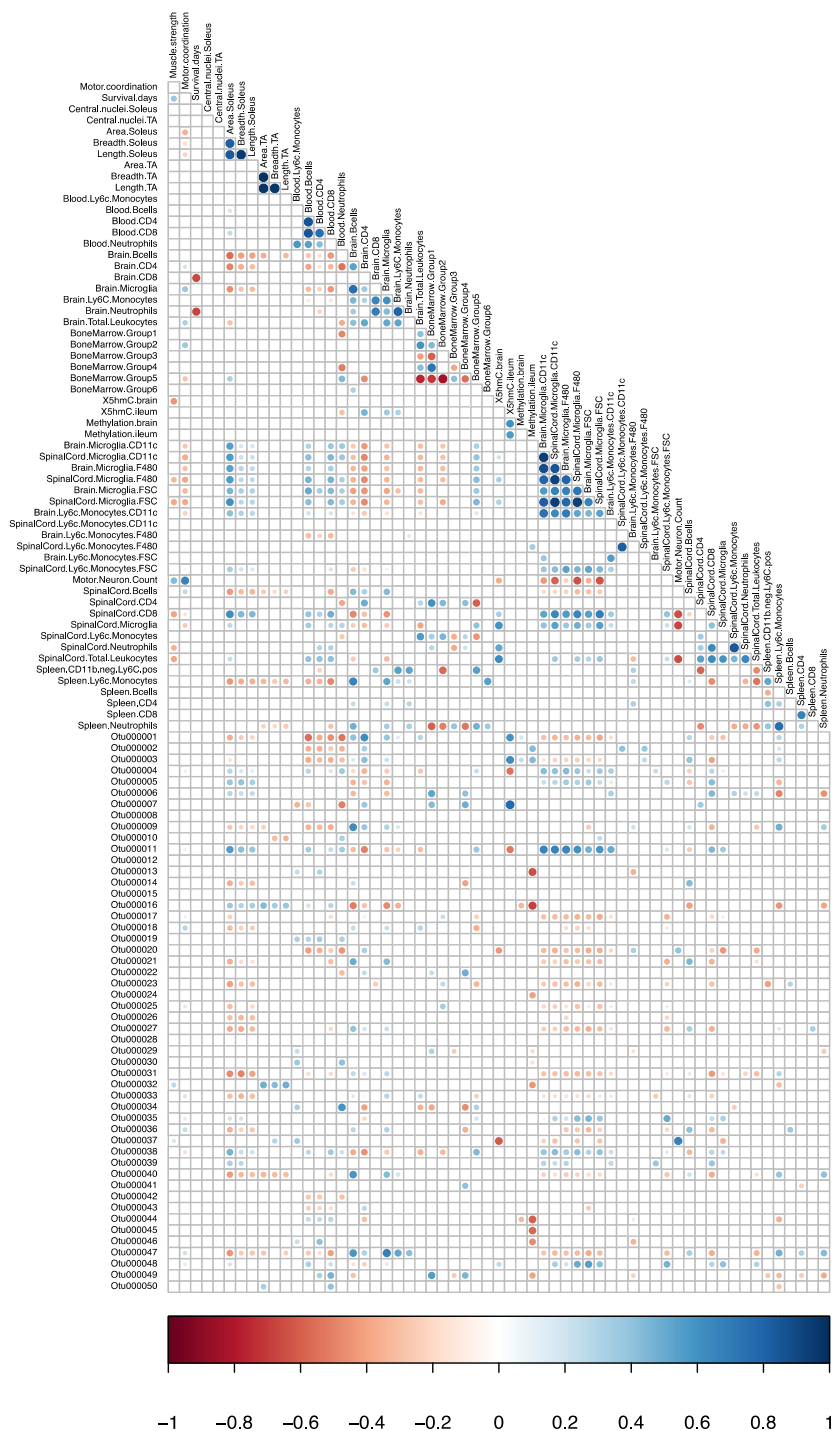

**Fig. S9. Specific microbiome, epigenome, and immune changes are correlated in ALS.** The correlation for the top 50 OTUs with immunophenotype, neuromuscular status, and DNA methylation is shown. The analysis was performed using Pearson correlation. Significant correlations are plotted as a circle at the intersection between correlated parameters along the y-axis with parameters on the diagonal. Circles are color coded on a scale of highly positively correlated (1, blue) and highly negatively correlated (-1, red).

**Table S1. Quantification of beta diversity of bacterial communities in ileum, colon, and fecal pellets in SOD1<sup>G93A</sup> versus WT mice using ASVs by phylogenetic (UniFrac, UF) and non-phylogenetic (Euclidean, E; Bray-Curtis, BC) methods. Asterisks denote *P*-values less than 0.05.**

| Age (days) | Method | Ileum <i>P</i> -values | Colon <i>P</i> -values | Fecal pellets <i>P</i> -values |
|------------|--------|------------------------|------------------------|--------------------------------|
| 37         | E      | 0.492                  | 0.905                  | 0.307                          |
|            | UF     | 0.411                  | 0.579                  | 0.139                          |
|            | BC     | 0.743                  | 0.823                  | 0.245                          |
| 45         | E      |                        |                        | 0.246                          |
|            | UF     |                        |                        | 0.030*                         |
|            | BC     |                        |                        | 0.050                          |
| 60         | E      | 0.141                  | 0.119                  | 0.011*                         |
|            | UF     | 0.669                  | 0.034*                 | 0.042*                         |
|            | BC     | 0.163                  | 0.097                  | 0.001*                         |
| 75         | E      |                        |                        | 0.109                          |
|            | UF     |                        |                        | 0.018*                         |
|            | BC     |                        |                        | 0.050                          |
| 90         | E      | 0.020*                 | 0.004*                 | 0.010*                         |
|            | UF     | 0.380                  | 0.034*                 | 0.020*                         |
|            | BC     | 0.013*                 | 0.011*                 | 0.010*                         |
| 105        | E      |                        |                        | 0.132                          |
|            | UF     |                        |                        | 0.092                          |
|            | BC     |                        |                        | 0.079                          |
| 120        | E      |                        |                        | 0.090                          |
|            | UF     |                        |                        | 0.016*                         |
|            | BC     |                        |                        | 0.056                          |
| 135        | E      |                        |                        | 0.301                          |
|            | UF     |                        |                        | 0.010*                         |
|            | BC     |                        |                        | 0.130                          |
| ES         | E      | 0.294                  | 0.089                  | 0.245                          |
|            | UF     | 0.106                  | 0.044*                 | 0.077                          |
|            | BC     | 0.197                  | 0.036*                 | 0.106                          |

ASVs, amplicon sequence variants.

**Table S2. Quantification of beta diversity of bacterial communities in ileum, colon, and fecal pellets in SOD1<sup>G93A</sup> versus WT mice using OTUs and AMOVA. Asterisks denote *P*-values less than 0.05.**

| Age (days) | Ileum<br><i>P</i> -values | Colon<br><i>P</i> -values | Fecal<br>pellets<br><i>P</i> -values |
|------------|---------------------------|---------------------------|--------------------------------------|
| 37         | 0.679                     | 0.813                     | 0.515                                |
| 45         |                           |                           | 0.185                                |
| 60         | 0.058                     | 0.069                     | 0.014*                               |
| 75         |                           |                           | 0.040*                               |
| 90         | 0.016*                    | 0.001*                    | 0.006*                               |
| 105        |                           |                           | 0.191                                |
| 120        |                           |                           | 0.118                                |
| 135        |                           |                           | 0.188                                |
| ES         | 0.100                     | 0.128                     | 0.217                                |

AMOVA, analysis of molecular variance; ES, end-stage; OTUs, operational taxonomic units.

**Table S3. F and B contributions across ileum, colon, and fecal pellets in SOD1<sup>G93A</sup> versus WT mice.** *P*-values were evaluated to identify statically significant differences by Mann-Whitney test for each F and B species that contributed >1% to abundance. Asterisks denote *P*-values less than 0.05.

|         | Age<br>(days) | Firmicutes<br><i>P</i> -values | Bacteroidetes<br><i>P</i> -values |
|---------|---------------|--------------------------------|-----------------------------------|
| Ileum   | 37            | 0.69                           | 0.76                              |
|         | 60            | 0.47                           | 0.33                              |
|         | 90            | 0.57                           | 0.18                              |
|         | ES            | 0.05                           | 0.03*                             |
| Colon   | 37            | 0.64                           | 0.74                              |
|         | 60            | 0.27                           | 0.02*                             |
|         | 90            | 0.76                           | 0.36                              |
|         | ES            | 0.19                           | 0.60                              |
| Pellets | 37            | 0.02*                          | 0.77                              |
|         | 60            | 0.04*                          | 0.80                              |
|         | 90            | 0.10                           | 0.53                              |
|         | ES            | 0.67                           | 0.46                              |

**Table S4. Fifty most populated OTUs used for the correlation analysis.** The number of species within each OTU (size) and taxonomy listed in order of kingdom, phylum, class, order, family, genus, species and the number of species.

| OTU       | Size   | Taxonomy                                                                                                               |
|-----------|--------|------------------------------------------------------------------------------------------------------------------------|
| OTU000001 | 883802 | Bacteria(100);Bacteroidetes(100);Bacteroidia(100);Bacteroidales(100);Porphyromonadaceae(100);unclassified(100)         |
| OTU000002 | 590546 | Bacteria(100);Firmicutes(100);Bacilli(100);Lactobacillales(100);Lactobacillaceae(100);Lactobacillus(100)               |
| OTU000003 | 444608 | Bacteria(100);Bacteroidetes(100);Bacteroidia(100);Bacteroidales(100);Porphyromonadaceae(100);unclassified(100)         |
| OTU000004 | 277552 | Bacteria(100);Bacteroidetes(100);Bacteroidia(100);Bacteroidales(100);Porphyromonadaceae(100);unclassified(100)         |
| OTU000005 | 277267 | Bacteria(100);Firmicutes(100);Erysipelotrichia(100);Erysipelotrichales(100);Erysipelotrichaceae(100);Turicibacter(100) |
| OTU000006 | 262866 | Bacteria(100);Bacteroidetes(100);Bacteroidia(100);Bacteroidales(100);Porphyromonadaceae(100);unclassified(100)         |
| OTU000007 | 261009 | Bacteria(100);Bacteroidetes(100);Bacteroidia(100);Bacteroidales(100);Porphyromonadaceae(100);unclassified(100)         |
| OTU000008 | 207013 | Bacteria(100);Firmicutes(100);Clostridia(100);Clostridiales(100);Lachnospiraceae(100);unclassified(100)                |
| OTU000009 | 176647 | Bacteria(100);Firmicutes(100);Bacilli(100);Lactobacillales(100);Lactobacillaceae(100);Lactobacillus(100)               |
| OTU000010 | 147779 | Bacteria(100);Bacteroidetes(100);Bacteroidia(100);Bacteroidales(100);Porphyromonadaceae(100);unclassified(100)         |
| OTU000011 | 116171 | Bacteria(100);Bacteroidetes(100);Bacteroidia(100);Bacteroidales(100);Porphyromonadaceae(100);Barnesiella(100)          |
| OTU000012 | 99899  | Bacteria(100);Firmicutes(100);Clostridia(100);Clostridiales(100);Lachnospiraceae(100);unclassified(100)                |
| OTU000013 | 96228  | Bacteria(100);Firmicutes(100);Clostridia(100);Clostridiales(100);Ruminococcaceae(100);Oscillibacter(100)               |
| OTU000014 | 84891  | Bacteria(100);Firmicutes(100);Clostridia(100);Clostridiales(100);Lachnospiraceae(100);unclassified(100)                |
| OTU000015 | 84695  | Bacteria(100);Firmicutes(100);Clostridia(100);Clostridiales(100);Clostridiaceae_1(100);Clostridium_sensu_stricto(100)  |
| OTU000016 | 73849  | Bacteria(100);Firmicutes(100);Clostridia(100);Clostridiales(100);Lachnospiraceae(100);unclassified(100)                |

|           |       |                                                                                                                        |
|-----------|-------|------------------------------------------------------------------------------------------------------------------------|
| OTU000017 | 67926 | Bacteria(100);unclassified(100);unclassified(100);unclassified(100);unclassified(100);unclassified(100)                |
| OTU000018 | 67533 | Bacteria(100);Firmicutes(100);Clostridia(100);Clostridiales(100);Lachnospiraceae(100);unclassified(98)                 |
| OTU000019 | 63873 | Bacteria(100);Firmicutes(100);Clostridia(100);Clostridiales(100);Lachnospiraceae(100);unclassified(100)                |
| OTU000020 | 59084 | Bacteria(100);Bacteroidetes(100);Bacteroidia(100);Bacteroidales(100);Porphyromonadaceae(100);unclassified(100)         |
| OTU000021 | 58349 | Bacteria(100);Firmicutes(100);Clostridia(100);Clostridiales(100);Lachnospiraceae(100);unclassified(100)                |
| OTU000022 | 56845 | Bacteria(100);Bacteroidetes(100);Bacteroidia(100);Bacteroidales(100);Porphyromonadaceae(100);unclassified(100)         |
| OTU000023 | 55850 | Bacteria(100);Firmicutes(100);Clostridia(100);Clostridiales(100);Lachnospiraceae(100);unclassified(100)                |
| OTU000024 | 54799 | Bacteria(100);Firmicutes(100);Clostridia(100);Clostridiales(100);Lachnospiraceae(100);Clostridium_XIVa(85)             |
| OTU000025 | 53981 | Bacteria(100);Firmicutes(100);Clostridia(100);Clostridiales(100);Lachnospiraceae(100);unclassified(100)                |
| OTU000026 | 52217 | Bacteria(100);Firmicutes(100);Clostridia(100);Clostridiales(100);unclassified(100);unclassified(100)                   |
| OTU000027 | 51049 | Bacteria(100);Firmicutes(100);Clostridia(100);Clostridiales(100);Lachnospiraceae(100);unclassified(100)                |
| OTU000028 | 50139 | Bacteria(100);Bacteroidetes(100);Bacteroidia(100);Bacteroidales(100);Porphyromonadaceae(100);unclassified(100)         |
| OTU000029 | 48349 | Bacteria(100);Firmicutes(100);Clostridia(100);Clostridiales(100);Ruminococcaceae(100);unclassified(98)                 |
| OTU000030 | 44587 | Bacteria(100);Firmicutes(100);Clostridia(100);Clostridiales(100);Ruminococcaceae(100);unclassified(70)                 |
| OTU000031 | 43622 | Bacteria(100);Firmicutes(100);Clostridia(100);Clostridiales(100);Lachnospiraceae(100);unclassified(100)                |
| OTU000032 | 42111 | Bacteria(100);Firmicutes(100);Clostridia(100);Clostridiales(100);Lachnospiraceae(100);unclassified(100)                |
| OTU000033 | 41423 | Bacteria(100);Firmicutes(100);Clostridia(100);Clostridiales(100);Lachnospiraceae(100);unclassified(100)                |
| OTU000034 | 40786 | Bacteria(100);Firmicutes(100);Clostridia(100);Clostridiales(100);Lachnospiraceae(100);unclassified(100)                |
| OTU000035 | 39264 | Bacteria(100);Firmicutes(100);Erysipelotrichia(100);Erysipelotrichales(100);Erysipelotrichaceae(100);unclassified(100) |



|           |       |                                                                                                                        |
|-----------|-------|------------------------------------------------------------------------------------------------------------------------|
| OTU000036 | 38613 | Bacteria(100);Tenericutes(100);Mollicutes(100);Anaeroplasmatales(100);Anaeroplasmataceae(100);Anaeroplasma(100)        |
| OTU000037 | 35714 | Bacteria(100);Firmicutes(100);Clostridia(100);Clostridiales(100);Ruminococcaceae(100);unclassified(100)                |
| OTU000038 | 35176 | Bacteria(100);Firmicutes(100);Clostridia(100);Clostridiales(100);Lachnospiraceae(100);unclassified(100)                |
| OTU000039 | 34422 | Bacteria(100);Bacteroidetes(100);Bacteroidia(100);Bacteroidales(100);Porphyromonadaceae(100);unclassified(100)         |
| OTU000040 | 31829 | Bacteria(100);Firmicutes(100);Clostridia(100);Clostridiales(100);Lachnospiraceae(100);unclassified(100)                |
| OTU000041 | 30159 | Bacteria(100);Firmicutes(100);Clostridia(100);Clostridiales(100);Lachnospiraceae(100);unclassified(100)                |
| OTU000042 | 29472 | Bacteria(100);Firmicutes(100);Clostridia(100);Clostridiales(100);Peptostreptococcaceae(100);Clostridium_XI(98)         |
| OTU000043 | 29186 | Bacteria(100);Firmicutes(100);Clostridia(100);Clostridiales(100);Lachnospiraceae(100);unclassified(100)                |
| OTU000044 | 28000 | Bacteria(100);Firmicutes(100);Clostridia(100);Clostridiales(100);Ruminococcaceae(100);Oscillibacter(100)               |
| OTU000045 | 27526 | Bacteria(100);Firmicutes(100);Clostridia(100);Clostridiales(100);Lachnospiraceae(99);unclassified(99)                  |
| OTU000046 | 27445 | Bacteria(100);Firmicutes(100);Clostridia(100);Clostridiales(100);Lachnospiraceae(100);unclassified(100)                |
| OTU000047 | 27252 | Bacteria(100);Actinobacteria(100);Actinobacteria(100);Coriobacteriales(100);Coriobacteriaceae(100);Asaccharobacter(88) |
| OTU000048 | 27049 | Bacteria(100);Bacteroidetes(100);Bacteroidia(100);Bacteroidales(100);Porphyromonadaceae(100);unclassified(100)         |
| OTU000049 | 24695 | Bacteria(100);Firmicutes(100);Clostridia(100);Clostridiales(100);Lachnospiraceae(100);Johnsonella(100)                 |
| OTU000050 | 24126 | Bacteria(100);Firmicutes(100);Clostridia(100);Clostridiales(100);Lachnospiraceae(100);unclassified(100)                |

OTUs, operational taxonomic units.

**Table S5. Correlation analysis results of pathological processes in SOD1<sup>G93A</sup> ALS mice with OTUs.**

| OTU       | Correlation                                                                                                  |
|-----------|--------------------------------------------------------------------------------------------------------------|
| OTU000037 | Correlated positively with motor neuron density                                                              |
| OTU000032 | Correlated positively with TA muscle size (area, breadth, length)                                            |
| OTU000001 | Correlated negatively with activated brain and spinal cord microglia, and with spinal cord CD8 T cell levels |
| OTU000020 |                                                                                                              |
| OTU000021 |                                                                                                              |
| OTU000023 |                                                                                                              |
| OTU000025 |                                                                                                              |
| OTU000027 |                                                                                                              |
| OTU000031 |                                                                                                              |
| OTU000040 |                                                                                                              |
| OTU000047 |                                                                                                              |
| OTU000004 | Correlated positively with activated brain and spinal cord microglia, and with spinal cord CD8 T cell levels |
| OTU000005 |                                                                                                              |
| OTU000011 |                                                                                                              |
| OTU000035 |                                                                                                              |
| OTU000038 |                                                                                                              |
| OTU000048 | Correlated positively with global ileum 5hmC                                                                 |
| OTU000001 |                                                                                                              |
| OTU000003 |                                                                                                              |
| OTU000007 | Correlated negatively with global ileum 5hmC                                                                 |
| OTU000004 |                                                                                                              |
| OTU000011 | Correlated negatively with global ileum 5hmC                                                                 |
| OTU000037 | Correlated negatively with global brain 5hmC                                                                 |
| OTU000002 | Correlated positively with global ileum 5mC                                                                  |
| OTU000003 |                                                                                                              |
| OTU000013 | Correlated negatively with global ileum 5mC                                                                  |
| OTU000016 |                                                                                                              |
| OTU000044 |                                                                                                              |
| OTU000045 |                                                                                                              |

OTUs, operational taxonomic units; TA, tibialis anterior muscle.

**Table S6. Antibody characteristics from MATERIALS AND METHODS section.**

| Antibody                   | Manufacturer             | Catalog # | Batch   | Reactivity             | Clone      | Isotype          | Dilution | RRID        | references                    |
|----------------------------|--------------------------|-----------|---------|------------------------|------------|------------------|----------|-------------|-------------------------------|
| APC-CD45                   | BD Biosciences           | 559864    | 3354869 | Mouse                  | 30-F11     | Rat              | 1:200    | AB_398672   | (Peng et al., 2014)           |
| BV421-CD11c                | BioLegend                | 117330    | B180890 | Mouse                  | N418       | Armenian Hamster | 1:100    | AB_11219593 | (Benson et al., 2007)         |
| BV421-CD8                  | BioLegend                | 100738    | B190821 | Mouse                  | 53-6.7     | Rat              | 1:100    | AB_11204079 | (Ko et al., 2005)             |
| FITC-Ly6C                  | BioLegend                | 128006    | B193352 | Mouse                  | HK1.4      | Rat              | 1:100    | AB_1186135  | (Watson et al., 2015)         |
| PE-F4/80                   | BioLegend                | 123110    | B181891 | Mouse                  | BM8        | Rat              | 1:200    | AB_893486   | (Poeckel et al., 2009)        |
| PE-CD31                    | BioLegend                | 102408    | B163731 | Mouse                  | 390        | Rat              | 1:200    | AB_312903   | (Greineder et al., 2013)      |
| PerCP-CD3                  | BioLegend                | 100326    | B187521 | Mouse                  | 145-2C11   | Armenian Hamster | 1:200    | AB_893317   | (Leo et al., 1987)            |
| PerCP-CD19                 | BioLegend                | 115532    | B173071 | Mouse                  | 6D5        | Rat              | 1:200    | AB_2072926  | (Bankoti et al., 2010)        |
| PE/Cy7-Ly6G                | BioLegend                | 127618    | B222650 | Mouse                  | 1A8        | Rat              | 1:500    | AB_1877261  | (Tadagavadi and Reeves, 2010) |
| APC/Cy7-CD11b              | BioLegend                | 101226    | B191242 | Mouse                  | M1/70      | Rat              | 1:500    | AB_830642   | (Tan et al., 2006)            |
| APC/Cy7-CD4                | BioLegend                | 100414    | B186911 | Mouse                  | GK1.5      | Rat              | 1:200    | AB_312699   | (Felix et al., 2007)          |
| Dystrophin                 | Abcam                    | ab15277   |         | Mouse, Rat, Dog, Human | Polyclonal | Rabbit           | 1:300    | AB_301813   | (Jelinkova et al., 2019)      |
| Secondary, Alexa Fluor 488 | Thermo Fisher Scientific | A-11034   |         | Rabbit                 | Polyclonal | Goat             | 1:1000   | AB_2576217  | (Brendel et al., 2017)        |

APC, allophycocyanin; APC/Cy7, APC and Cy7 conjugate; BV421, Brilliant Violet 421™; Cy7, cyanine 7; FITC, fluorescein isothiocyanate; PE, R-phycoerythrin; PE/Cy7, PE and Cy7 conjugate; PerCP, peridinin-chlorophyll-protein.

- BANKOTI, J., BURNETT, A., NAVARRO, S., MILLER, A. K., RASE, B. & SHEPHERD, D. M. 2010. Effects of TCDD on the fate of naive dendritic cells. *Toxicol Sci*, 115, 422-34.
- BENSON, M. J., PINO-LAGOS, K., ROSEMBLATT, M. & NOELLE, R. J. 2007. All-trans retinoic acid mediates enhanced T reg cell growth, differentiation, and gut homing in the face of high levels of co-stimulation. *J Exp Med*, 204, 1765-74.
- BRENDEL, M., KLEINBERGER, G., PROBST, F., JAWORSKA, A., OVERHOFF, F., BLUME, T., ALBERT, N. L., CARLSEN, J., LINDNER, S., GILDEHAUS, F. J., OZMEN, L., SUAREZ-CALVET, M., BARTENSTEIN, P., BAUMANN, K., EWERS, M., HERMS, J., HAASS, C. & ROMINGER, A. 2017. Increase of TREM2 during Aging of an Alzheimer's Disease Mouse Model Is Paralleled by Microglial Activation and Amyloidosis. *Front Aging Neurosci*, 9, 8.
- FELIX, N. J., DONERMEYER, D. L., HORVATH, S., WALTERS, J. J., GROSS, M. L., SURI, A. & ALLEN, P. M. 2007. Alloreactive T cells respond specifically to multiple distinct peptide-MHC complexes. *Nat Immunol*, 8, 388-97.
- GREINER, C. F., CHACKO, A. M., ZAYTSEV, S., ZERN, B. J., CARNEMOLLA, R., HOOD, E. D., HAN, J., DING, B. S., ESMON, C. T. & MUZYKANTOV, V. R. 2013. Vascular immunotargeting to endothelial determinant ICAM-1 enables optimal partnering of recombinant scFv-thrombomodulin fusion with endogenous cofactor. *PLoS One*, 8, e80110.
- JELINKOVA, S., FOJTIK, P., KOHUTOVA, A., VILOTIC, A., MARKOVA, L., PESL, M., JURAKOVA, T., KRUTA, M., VRBSKY, J., GAILLYOVA, R., VALASKOVA, I., FRAK, I., LACAMPAGNE, A., FORTE, G., DVORAK, P., MELI, A. C. & ROTREKL, V. 2019. Dystrophin Deficiency Leads to Genomic Instability in Human Pluripotent Stem Cells via NO Synthase-Induced Oxidative Stress. *Cells*, 8.
- KO, S. Y., KO, H. J., CHANG, W. S., PARK, S. H., KWEON, M. N. & KANG, C. Y. 2005. alpha-Galactosylceramide can act as a nasal vaccine adjuvant inducing protective immune responses against viral infection and tumor. *J Immunol*, 175, 3309-17.
- LEO, O., FOO, M., SACHS, D. H., SAMELSON, L. E. & BLUESTONE, J. A. 1987. Identification of a monoclonal antibody specific for a murine T3 polypeptide. *Proc Natl Acad Sci U S A*, 84, 1374-8.
- PENG, B., XIAO, J., WANG, K., SO, K. F., TIPOE, G. L. & LIN, B. 2014. Suppression of microglial activation is neuroprotective in a mouse model of human retinitis pigmentosa. *J Neurosci*, 34, 8139-50.
- POECKEL, D., ZEMSKI BERRY, K. A., MURPHY, R. C. & FUNK, C. D. 2009. Dual 12/15- and 5-lipoxygenase deficiency in macrophages alters arachidonic acid metabolism and attenuates peritonitis and atherosclerosis in ApoE knock-out mice. *J Biol Chem*, 284, 21077-89.
- TADAGAVADI, R. K. & REEVES, W. B. 2010. Endogenous IL-10 attenuates cisplatin nephrotoxicity: role of dendritic cells. *J Immunol*, 185, 4904-11.
- TAN, S. L., ZHAO, J., BI, C., CHEN, X. C., HEPBURN, D. L., WANG, J., SEDGWICK, J. D., CHINTALACHARUVU, S. R. & NA, S. 2006. Resistance to experimental autoimmune encephalomyelitis and impaired IL-17 production in protein kinase C theta-deficient mice. *J Immunol*, 176, 2872-9.
- WATSON, N. B., SCHNEIDER, K. M. & MASSA, P. T. 2015. SHP-1-dependent macrophage differentiation exacerbates virus-induced myositis. *J Immunol*, 194, 2796-809.
